# Supplementary material
Source: PubMed Central journal article supplement (PMC2848112)

**a**

ephrin-B2 KFQEF**FSPNL**WGLEFQKNKDYIIISTNSGSLEGLDNQEGGVCQTRAMKILMKVGQDA 180  
 S37 KFQEF**FSPDL**WGLEFQKNKDYIIISTNSGSLEGLDNQEGGVCQTRAMKILMKVGQDA 180  
 S47 KFQE**AAPAA**WGLEFQKNKDYIIISTNSGSLEGLDNQEGGVCQTRAMKILMKVGQDA 180

PM-efnB2intra MGCIKSKRKDKDLELKLRLIQSTRHRKHSPQH**PM**TTTTLSLSTLATPKRGGNNNGSEPSDV 60  
 efn-B2intra RHRKHSPQH**PM**TTTTLSLSTLATPKRGGNNNGSEPSDV 35

PM -efnB2intra IIPLR TADSVFCPHYEKVSGDYGHPVYIVQEMPPQSPANIYYKV 106  
 efn-B2intra IIPLR TADSVFCPHYEKVSGDYGHPVYIVQEMPPQSPANIYYKV 79

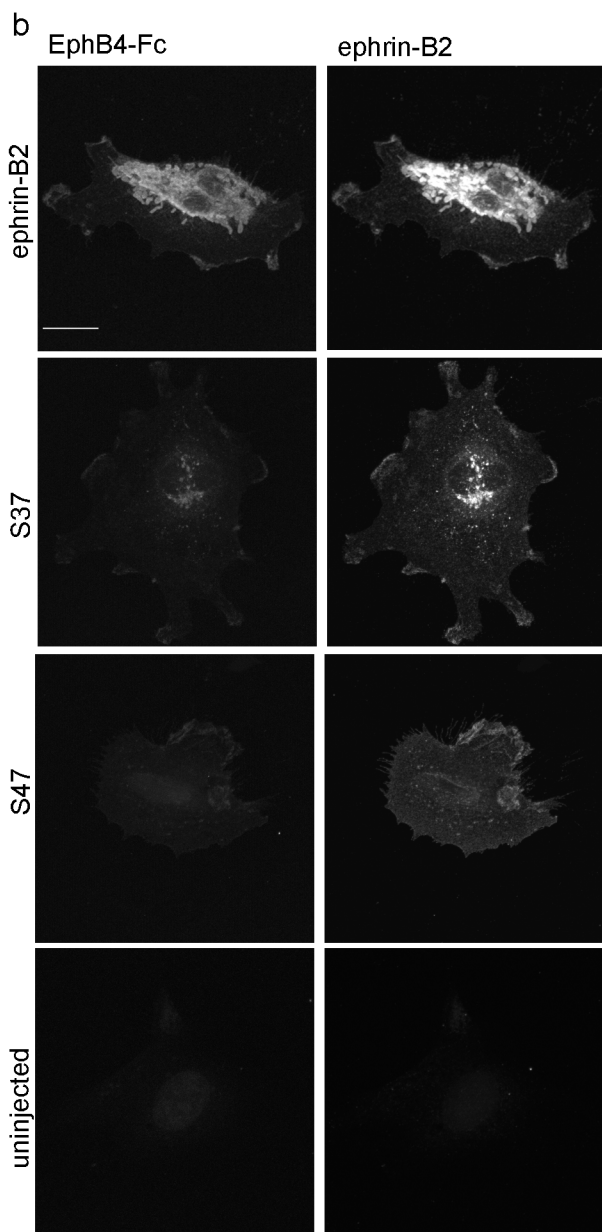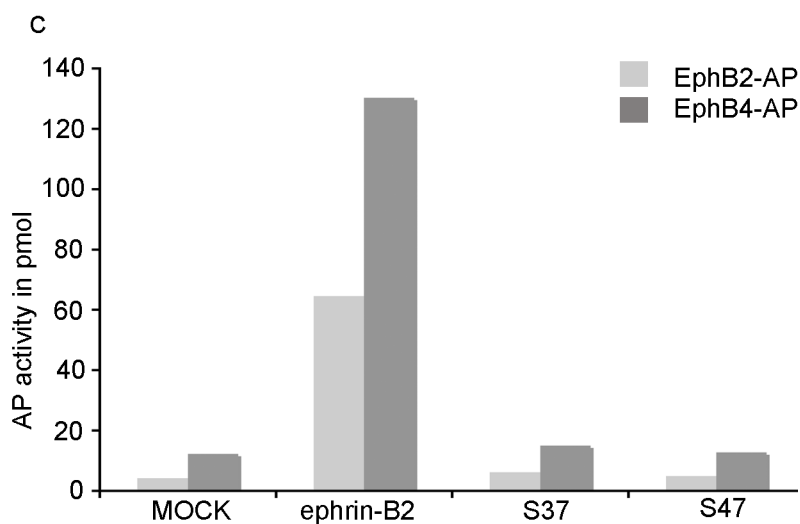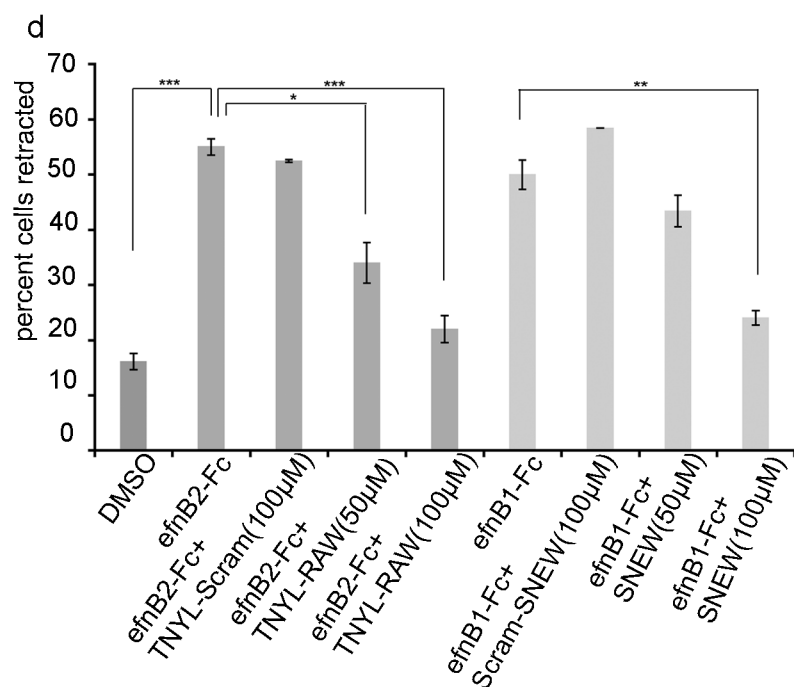

Supplement: jcs.061903_4.pdf [file jcs.061903_4.pdf]
