# Supplementary material
Source: PubMed Central journal article supplement (PMC2848112)

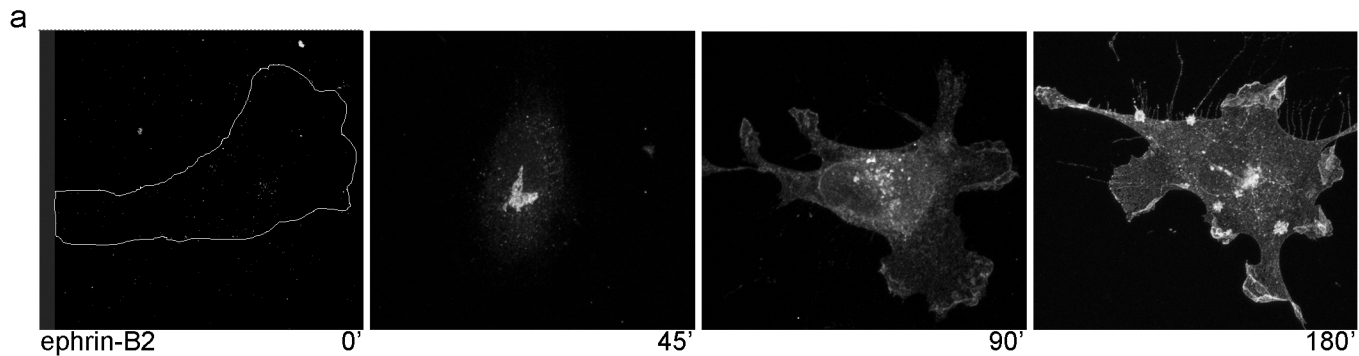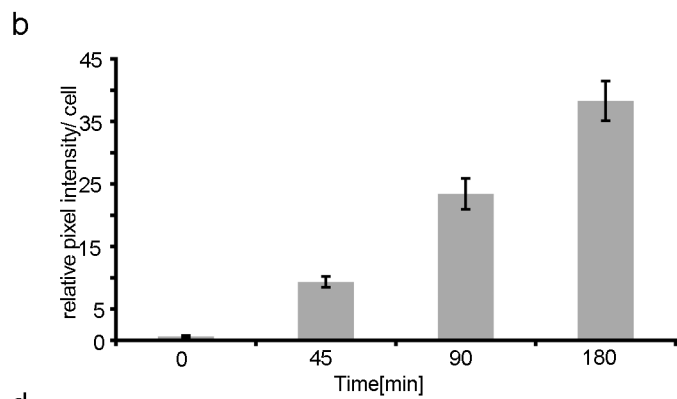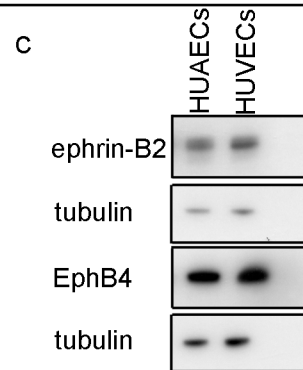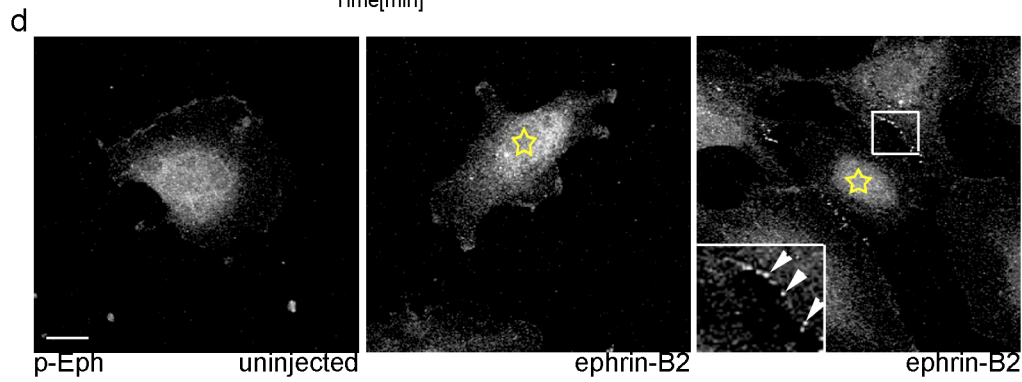

Supplement: jcs.061903_1.pdf [file jcs.061903_1.pdf]

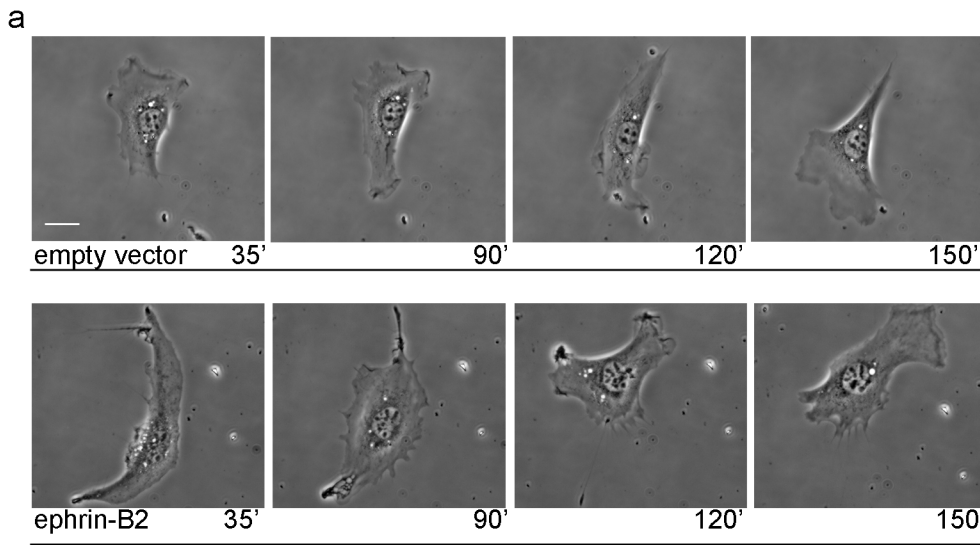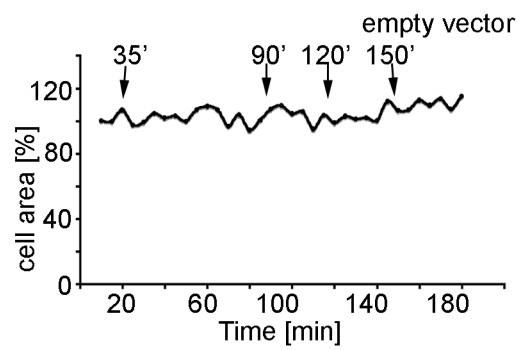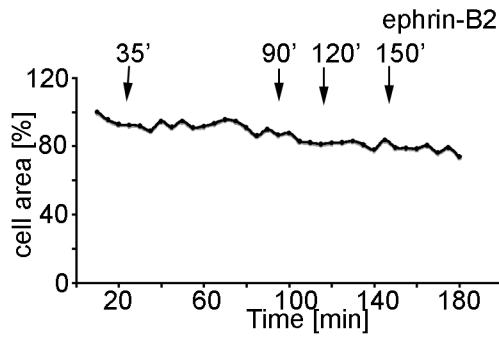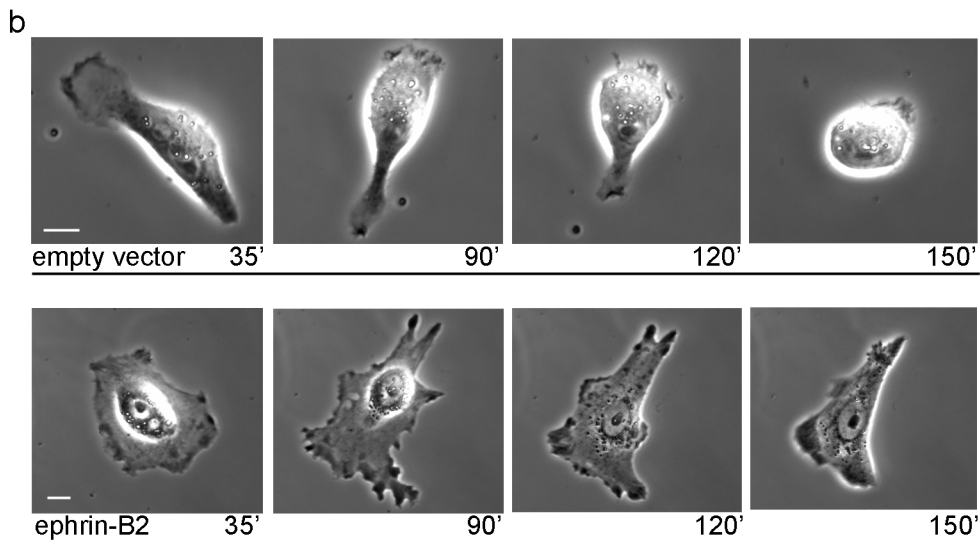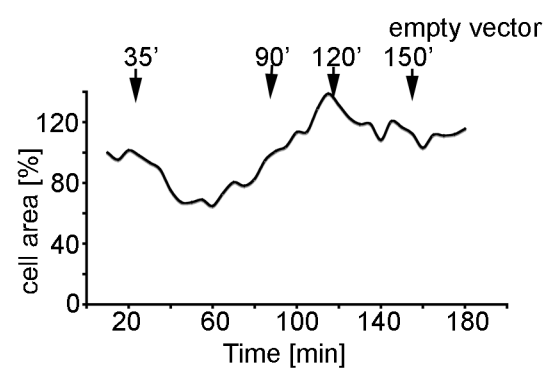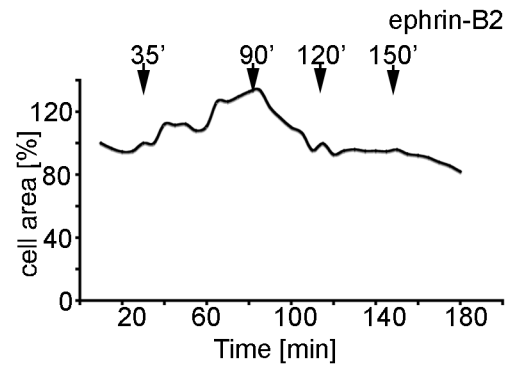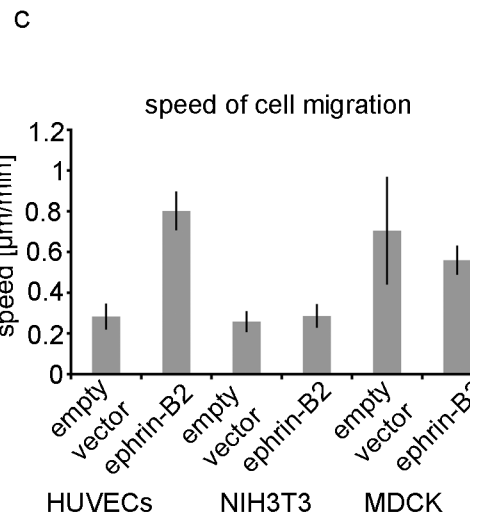

Supplement: jcs.061903_2.pdf [file jcs.061903_2.pdf]

a

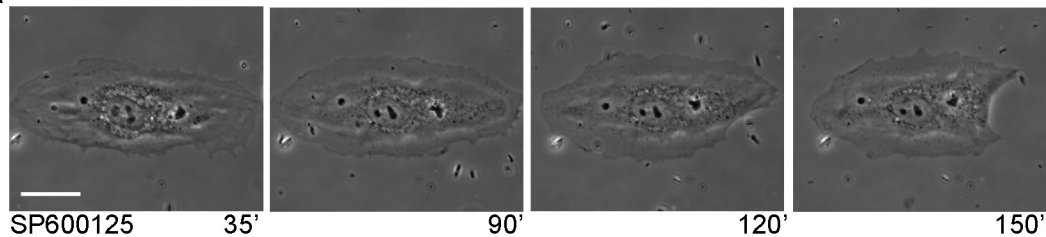

b

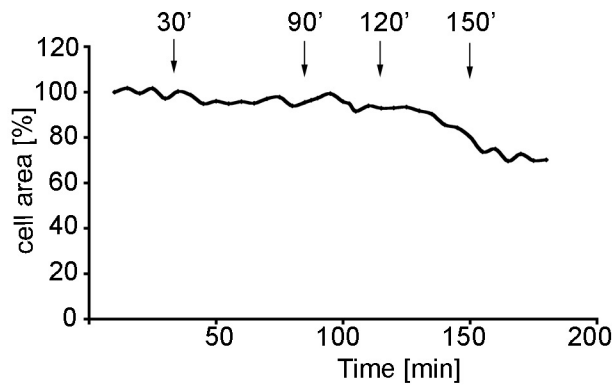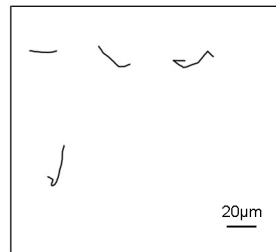

Supplement: jcs.061903_3.pdf [file jcs.061903_3.pdf]

a

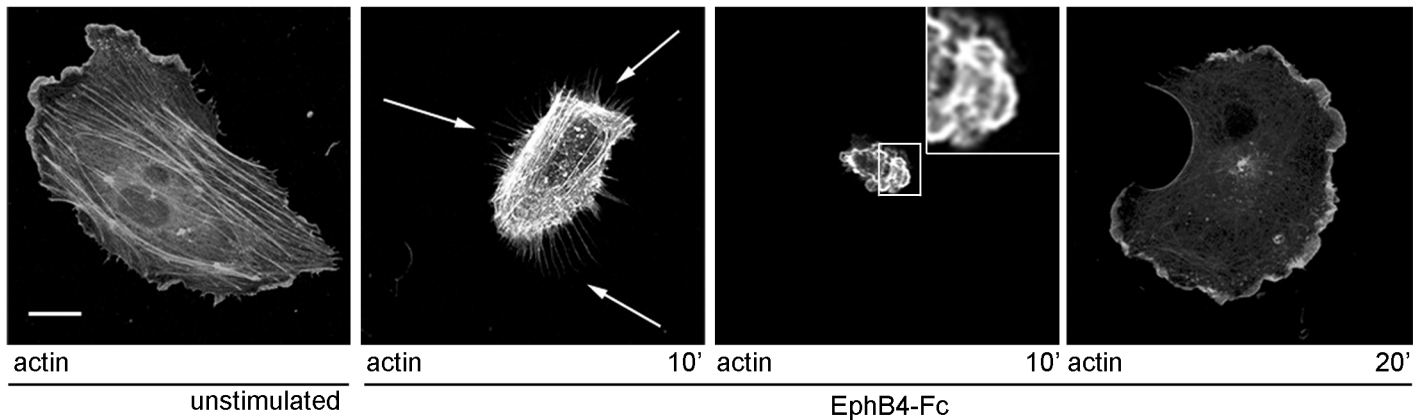

b

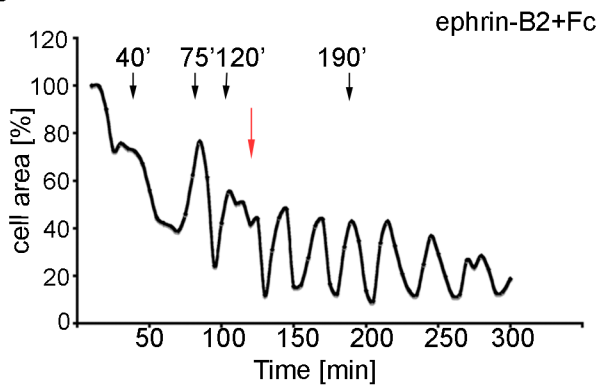

c

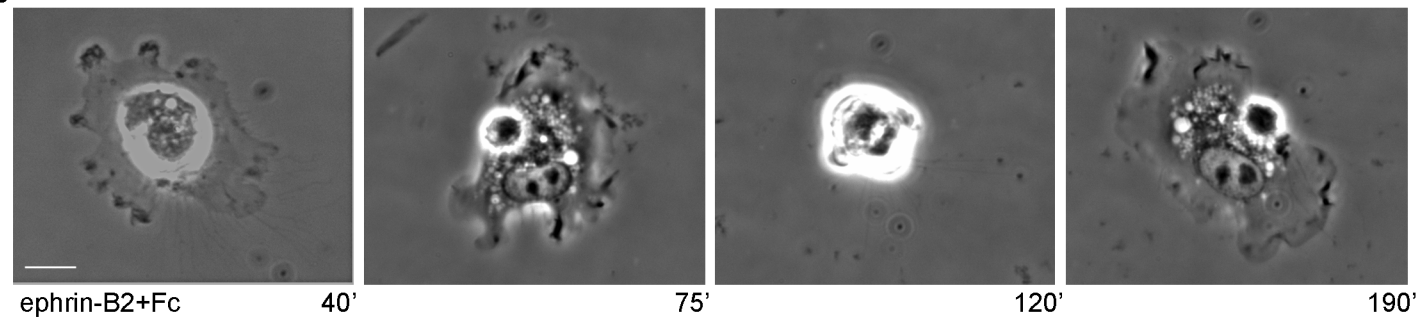

Supplement: jcs.061903_5.pdf [file jcs.061903_5.pdf]
